# Development and validation of a pretreatment prognostic index to predict death and lung metastases in extremity osteosarcoma

Bo Wang<sup>1,\*</sup>, Jian Tu<sup>1,\*</sup>, Junqiang Yin<sup>1</sup>, Changye Zou<sup>1</sup>, Jin Wang<sup>1</sup>, Gang Huang<sup>1</sup>, Xianbiao Xie<sup>1</sup>, Jingnan Shen<sup>1</sup>

<sup>1</sup>Musculoskeletal Oncology Center, the First Affiliated Hospital of Sun Yat-Sen University, Guangzhou, Guangdong, China

\*These authors have contributed equally to this work

## Correspondence to:

Xianbiao Xie, e-mail: xiexianbiao@hotmail.com  
Jingnan Shen, e-mail: shenj01@hotmail.com

**Keywords:** osteosarcoma, survival outcomes, lung metastases, pretreatment prognostic index

**Received:** May 16, 2015

**Accepted:** September 18, 2015

**Published:** October 01, 2015

## ABSTRACT

**Background:** To develop a prognostic index to predict the 5-year overall survival (OS) and 5-year lung metastasis-free survival (LMFS) of patients with extremity osteosarcoma at the time of diagnosis.

**Methods:** We retrospectively evaluated 454 patients with extremity osteosarcoma at our center from 2005 to 2013. The cohort was randomly divided into training and validation sets. The association of potential risk factors with OS and LMFS was assessed by Cox proportional hazards analysis in the training set, and a prognostic index was created according to scores that were proportional to a regression coefficient for each factor. This prognostic index was assessed in the validation set.

**Results:** For the 5-year OS, 5 independent prognostic factors were identified: tumor size, Enneking stage, pretreatment platelet, alkaline phosphatase (ALP), and neutrophils. The multivariate Cox model identified tumor size, pretreatment platelets, ALP, and neutrophils as associated with the 5-year LMFS. A prognostic index for death and lung metastases was calculated. Three risk groups were defined for each survival point: low, intermediate, and high risk for the 5-year OS; low, intermediate, and high risk for the 5-year LMFS. The C statistic for the 5-year OS was 0.723 in the training set and 0.710 in the validation set. The C statistic for the 5-year LMFS was 0.661 and 0.693 respectively.

**Conclusion:** This prognostic index is based on routine tests and characteristics of extremity osteosarcoma patients and is a useful predictor of OS and lung metastases. This index could be applied to clinical practice and trials for individualized risk-adapted therapies.

## INTRODUCTION

Osteosarcoma is the most common malignant bone tumor in children and adolescents, although it accounts for less than 0.5% of all cancers [1]. With the addition of neo-adjuvant chemotherapy and adjuvant chemotherapy, the rates of overall survival (OS) and salvage surgery have increased over the last three decades. For patients with non-metastatic osteosarcoma, 5-year OS has increased to 60 to 70%, but this rate decreases to 20% when metastases

occur [2]. Despite treatment improvements, marked heterogeneity in patient survival is observed.

Currently, the prognosis of osteosarcoma patients is primarily evaluated based on the Enneking staging system. A discrepancy often occurs between clinical outcomes and Enneking stage. Additionally, a limited number of clinico-pathological factors are available to predict the outcomes of osteosarcoma patients, especially at the time of diagnosis, which has made early identification and risk stratification therapy difficult in clinical practice. To

the best of our knowledge, pretreatment serum alkaline phosphatase (ALP) levels are widely accepted as a predictor of osteosarcoma patient survival. Our previous study also demonstrated the predictive value of ALP levels on the OS and disease-free survival (DFS) of osteosarcoma patients [3]. However, osteosarcoma has a remarkably heterogeneous clinical behavior, and no single factor can accurately predict its prognosis. The need to develop effective markers to predict the OS and risk of lung metastases of osteosarcoma patients and to develop individualized treatments is great.

Although cancer outcomes depend on the genetic basis of the cancer, increasing evidence suggests that systematic inflammatory responses and coagulation are associated with survival outcomes in patients with different tumor types [4–6]. Additionally, the systematic inflammatory response and coagulation can be assessed by measurements of routine blood test markers, such as albumin, white blood cells (WBCs), neutrophils, lymphocytes and platelets (PLTs). Moreover, a growing body of evidence indicates that several systemic inflammatory factors are related to the survival of soft tissue sarcoma patients [7–10]. Therefore, continuing efforts to investigate prognostic indexes related to the survival of osteosarcoma patients are needed.

In this study, we aimed to evaluate the relationship between clinical factors and survival outcomes and to develop a prognostic scoring system for osteosarcoma patients that could be used at the time of diagnosis.

## MATERIALS AND METHODS

### Patients

Patients with newly confirmed osteosarcoma who underwent standard chemotherapy and surgery between January 2005 and December 2013 at the First Affiliated Hospital of Sun Yat-sen University were retrospectively enrolled. Then, 75% of the included patients were randomly selected as the training set to explore the predictive value of clinical factors from routine blood tests and to develop a prognostic index. The remaining 25% of the included patients were selected as the validation set to assess the prognostic score index. The Institutional Ethical Board of our hospital approved this study.

The criteria for case inclusion were as follows:

- (1) histologically confirmed osteosarcoma by needle biopsy;
- (2) no prior chemotherapy or radiotherapy prior to diagnosis;
- (3) receipt of first-line neo-adjuvant chemotherapy, operation and adjuvant chemotherapy;
- (4) receipt of at least 1 cycle of neo-adjuvant chemotherapy and 3 cycles of adjuvant chemotherapy;
- and (5) presence of a tumor located in an extremity.

Patients with evidence of infectious or inflammatory diseases were excluded. Patients with symptoms such as fever or cough or who exhibited urethral stimulation

symptoms or signs such as lung rales were excluded because these symptoms were considered evidence of potentially infectious or inflammatory diseases. Then, procalcitonin and C-reactive protein assessments, blood culture, urine culture and lung X-ray were performed according to the patient's signs and symptoms. If any positive results were obtained, the patient was excluded following a discussion. Patients with a Karnofsky Performance State score <70 were excluded [11]. 15 Patients without completed follow-up information were excluded.

### Treatment

For definitive Enneking staging, a needle biopsy was performed for each patient. A computed tomography scan of the lung and a whole-body emission computed tomography scan were also performed. A total of four commonly used chemotherapeutic agents were administered according to the scheme presented in Figure 1: methotrexate, cisplatin, doxorubicin, and ifosfamide [3]. The interval between rounds of chemotherapy was 2 to 3 weeks. Then, 2 or 3 weeks after surgery, the patients would receive adjuvant chemotherapy if no complications were noted. All patients received standard chemotherapy including Methotrexate with different dose. For those >30 years old, 8–10 g/m<sup>2</sup> of methotrexate was administered to reach a peak blood concentration of over 800 umol/L. and for those younger patients, 10–12 g/m<sup>2</sup> of methotrexate was administered to reach a peak blood concentration of over 1000 umol/L, and according to literatures, both dose were proved to be effective [12, 13].

### Methods

Blood samples were obtained before the initial neo-adjuvant chemotherapy to measure the levels of albumin, WBCs, neutrophils, lymphocytes, PLTs, fibrinogen degradation products (FBGs), lactate dehydrogenase (LDH) and ALP. Because age influences ALP expression [14], 150 U/L was regarded as the upper serum ALP limit in patients less than 18 years, while 110 U/L was considered the limit in those 18 years and older.

### Statistical analyses

SPSS (version 19.0, Chicago, IL, USA) statistical software and R (version 3.0.1) were used for statistical analysis. Categorical variables were expressed as numbers and percentages, and the  $\chi^2$  test was used to compare differences between groups. Continuous variables were presented as means and standard deviations, and means were compared using the *t*-test. OS was defined as the time from diagnosis to death from any cause or to the last follow-up visit. Lung metastasis-free survival (LMFS) was defined as the time from diagnosis to the detection of

## Neoadjuvant chemotherapy

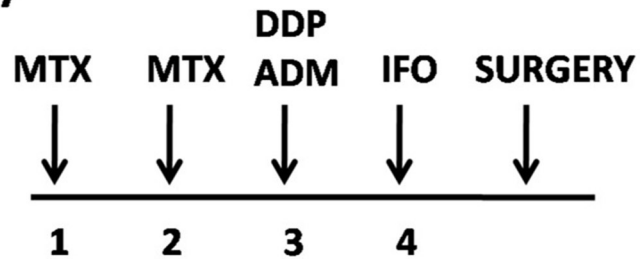

## Adjuvant chemotherapy

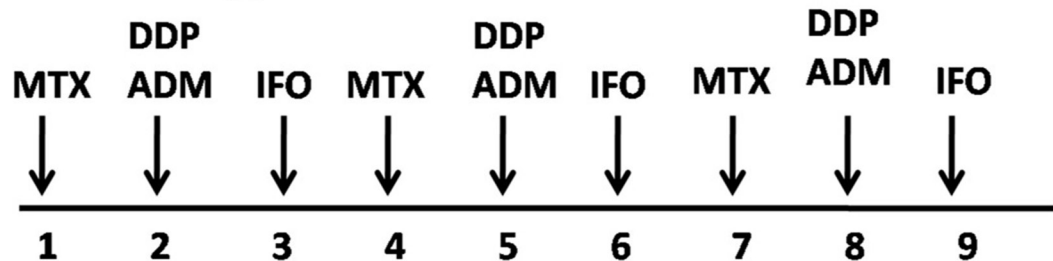

**Figure 1: The chemotherapeutic agents and the treatment protocol of 454 patients.**

lung metastasis. Surviving patients were censored in the analysis of OS. Patients with lung metastasis at the time of diagnosis were censored in the analysis of LMFS.

Kaplan–Meier survival analysis was performed to estimate OS and LMFS, and the log rank test was used to compare rates between two groups. Univariate and multivariate analyses were performed for prognostic factors using the Cox proportional hazard model. Variables identified as significant by univariate analysis were selected to test with the Cox proportional hazard model. A  $P$ -value  $\leq 0.05$  was considered indicative of a significant difference.

The prognostic index was formulated based on Cox proportional hazards analysis, which has been used in many previous studies to develop prognostic systems, such as the system reported by Rassi [15]. The prognostic score was assigned based on risk factors that were identified by multivariate analysis and weighted points proportional to the  $\beta$ -regression coefficient values, which were based on the linear transformation (rounded to the nearest integer). The coefficient of each variable was divided by the lowest  $\beta$  value and rounded to the nearest integer. The prognostic factor with the lowest  $\beta$ -regression coefficient was assigned a prognostic score of 1. Thereby, a prognostic score was calculated for each patient. Patients in the training set were divided into different subgroups based on their prognostic index value. Kaplan–Meier survival analysis was performed, and different subgroups were compared; subgroups without a significant difference in 5-year OS or LMFS were combined to form three groups [16]. Then, the patients in the training and validation sets were divided into three groups: patients at low risk,

patients at intermediate risk, and patients at high risk for 5-year OS and lung metastases. The C statistic was used to assess the predictive accuracy of the prognostic scoring system between the training and validation sets. The C statistic was calculated as  $(P_{\text{high}} - P_{\text{low}}) / 100$ , where  $P_{\text{high}}$  was the probability of death predicted for a patient in the group with the worst prognosis and  $P_{\text{low}}$  was the probability of death predicted for a patient in the group with the best prognosis [17].

## RESULTS

### Clinico-pathological patient characteristics

A total of 454 patients were included in this retrospective study (Figure 2). In total, 340 patients were included in the training set, and 114 patients were included in the validation set (Table 1). The mean and range of the age of the included patients were 17.2 and 6–55, respectively. The mean and range of the age of the patients in the training set were 17.2 and 6–53, respectively. The mean and range of the age of the patients in the validation set were 17.1 and 7–55, respectively. There were only 10 (2.2%) patients  $>40$  years of age. Six of these patients were in the training set, while the other 4 patients were in the validation set. No significant differences between the two cohorts were noted regarding the clinico-pathological factors that we analyzed. The median follow-up time was 30 months and ranged from 15 to 100 months. The 5-year OS of the included patients was 68%. In total, 47 (10.4%) patients had lung metastases at the time of diagnosis, and the 5-year LMFS of the remaining patients was 62.4% (Figure 3).

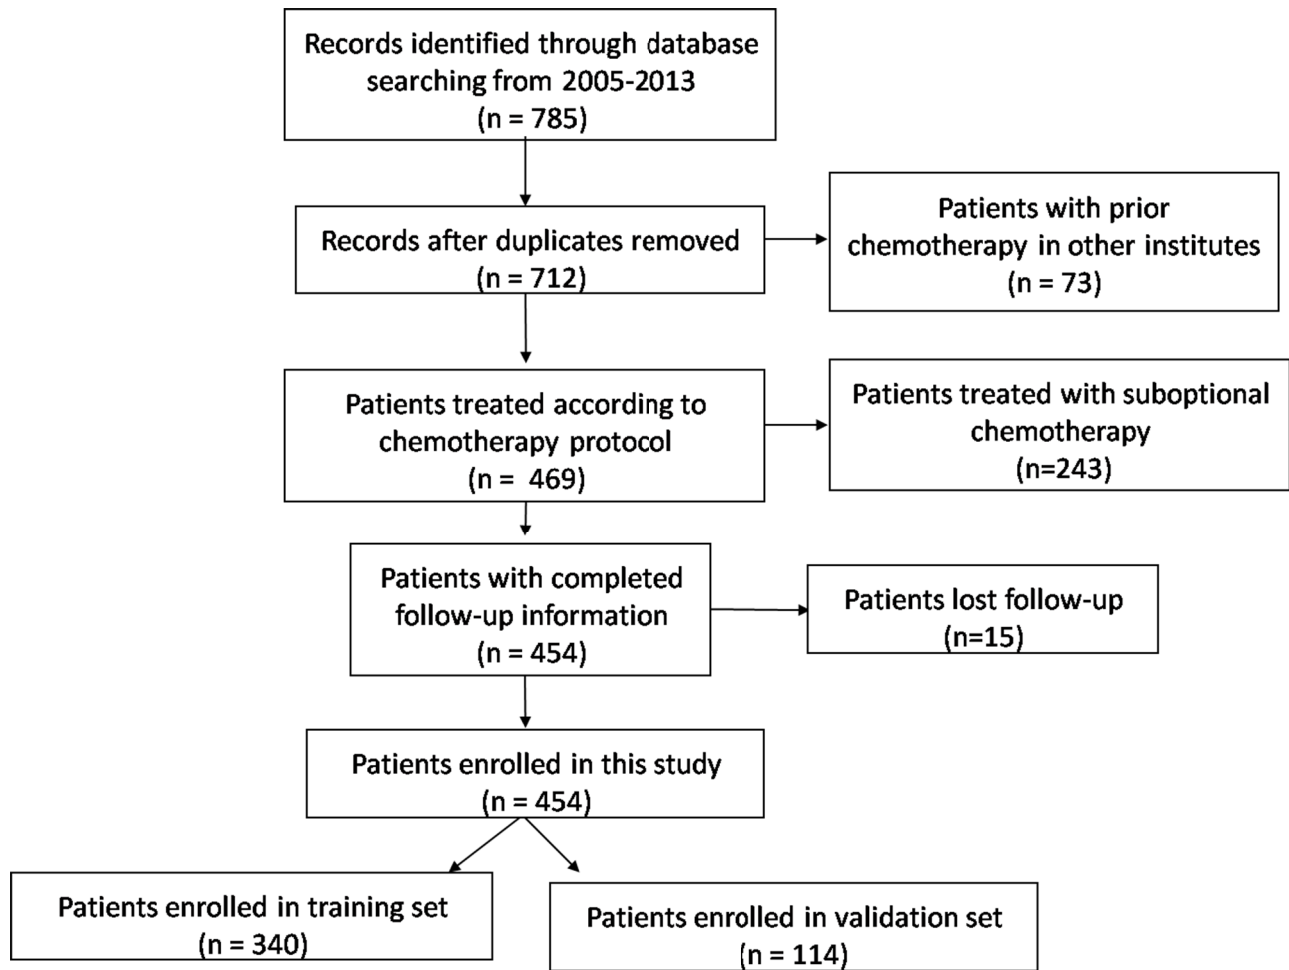

**Figure 2: Flow chart for patients selection in this study.**

### Univariate and multivariate analysis of prognostic factors for OS and LMFS in the training set

The results of univariate analysis of the training set are presented in Table 2. The factors identified as potentially associated with 5-year OS included the pretreatment Enneking stage, tumor size, neutrophil count, PLT count, LDH level and ALP level (all  $P < 0.05$ ). These potential factors were selected and analyzed using Cox proportional hazards models. The Enneking stage, tumor size, neutrophil count, PLT count, and ALP level maintained their prognostic significance for 5-year OS (all  $P < 0.05$ , Table 3). There was no significant difference in LDH level. The prognostic index of each risk factor for 5-year OS is summarized in Table 4A.

The same procedure was performed for 5-year LMFS. Univariate analysis demonstrated that the Enneking stage, tumor size, WBC count, neutrophil count, PLT count, LDH level, and ALP level were significantly associated with 5-year PMFS (all  $P < 0.05$ , Table 2). Multivariate analysis revealed that only tumor size, neutrophil count, PLT count, and ALP level were

independent prognostic factors for 5-year LMFS (all  $P < 0.05$ , Table 3). There were no significant differences in LDH level, WBC count or Enneking stage. The prognostic index of each risk factor for 5-year LMFS is summarized in Table 4B.

### Development of the prognostic index

To calculate a prognostic index, each independent prognostic factor was assigned a number of points based on its regression coefficient. The sum of the points was regarded as the prognostic score for each patient. For 5-year OS, the prognostic index ranged from 0 to 10 points. Patients in the training set were then divided into 11 subgroups to perform survival estimates. Among these groups, three were identified as having significantly different prognoses (Figure 4A), as follows: patients with low risk (0–3 points), patients with intermediate risk (4–6 points) and patients with high risk (7–10 points).

For 5-year LMFS, the prognostic index ranged from 0 to 5 points using the same methods. Patients in the training set were divided into 6 subgroups to perform survival estimates. Three groups were identified that

**Table 1: Characteristics of patients in the training and validation sets**

| Variable                                    | Training Set  | Validation Set | $\lambda^2$ | P-value |
|---------------------------------------------|---------------|----------------|-------------|---------|
| Gender                                      |               |                |             |         |
| Male                                        | 212           | 71             | 0.003       | 0.96    |
| Female                                      | 128           | 43             |             |         |
| Age                                         |               |                |             |         |
| <14                                         | 103           | 44             | 2.69        | 0.10    |
| ≥14                                         | 237           | 70             |             |         |
| Histological type                           |               |                |             |         |
| Osteoblastic                                | 272           | 88             | 3.28        | 0.35    |
| Chondroblastic                              | 46            | 13             |             |         |
| Fibroblastic                                | 10            | 5              |             |         |
| Others                                      | 12            | 8              |             |         |
| Enneking stage                              |               |                |             |         |
| IIA                                         | 38            | 15             | 5.26        | 0.07    |
| IIB                                         | 265           | 89             |             |         |
| III                                         | 37            | 10             |             |         |
| Tumor size                                  |               |                | 1.87        | 0.17    |
| ≤8 cm                                       | 156           | 40             |             |         |
| >8 cm                                       | 184           | 74             |             |         |
| Surgery type                                |               |                | 0.87        | 0.35    |
| Amputation                                  | 75            | 30             |             |         |
| Limb sparing                                | 265           | 84             |             |         |
| WBC<br>(mean ± SD) × 10 <sup>9</sup>        | 8.1 ± 2.9     | 8.1 ± 3.2      |             | 0.96    |
| Neutrophil<br>(mean ± SD) × 10 <sup>9</sup> | 5.1 ± 2.3     | 4.9 ± 2.4      |             | 0.84    |
| Lymphocyte<br>(mean ± SD) × 10 <sup>9</sup> | 2.2 ± 0.7     | 2.2 ± 0.7      |             | 0.61    |
| Platelet<br>(mean ± SD) × 10 <sup>9</sup>   | 294.6 ± 82.7  | 285.4 ± 83.6   |             | 0.31    |
| Hemoglobin<br>(mean ± SD) × 10 <sup>9</sup> | 130.8 ± 20.3  | 130.7 ± 19.1   |             | 0.95    |
| Albumin (mean ± SD)                         | 44.2 ± 5.2    | 43.3 ± 4.8     |             | 0.12    |
| Fibrinogen<br>(mean ± SD)                   | 3.6 ± 1.3     | 3.7 ± 2.0      |             | 0.37    |
| LDH (mean ± SD)                             | 284.2 ± 294.2 | 251.8 ± 161.6  |             | 0.27    |
| ALP (mean ± SD)                             | 355.3 ± 634.1 | 292.8 ± 453.2  |             | 0.33    |

WBC: white blood cell; LDH: lactate dehydrogenase; ALP: alkaline phosphatase.



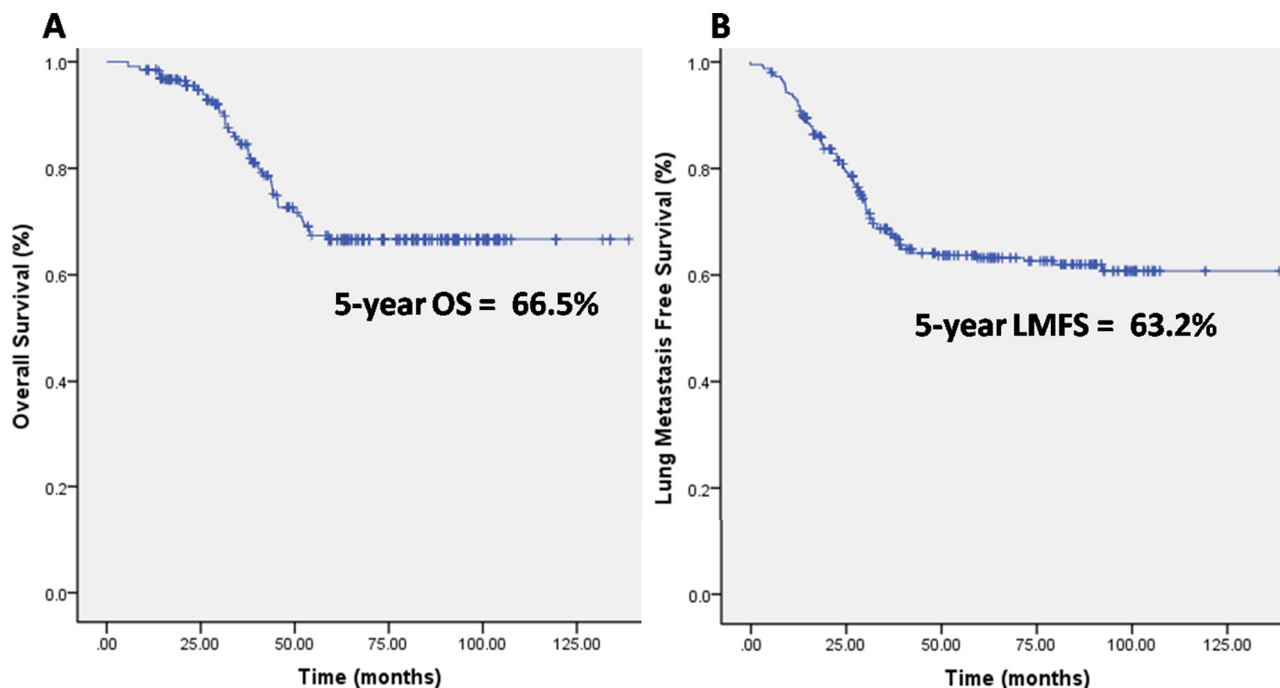

**Figure 3:** A. Kaplan-Meier curves showing the overall survival (OS) of the included patients. B. Kaplan-Meier curves showing the lung metastasis free survival (LMFS) of the included patients.

exhibited significantly different prognoses (Figure 5A): patients with low risk (0–1 points), patients with intermediate risk (2–3 points) and patients with high risk (4–5 points).

### Validation of the prognostic index

The validation set was analyzed based on the outcomes of the training set. After risk factors were identified in the training set, low-, medium- and high-risk groups were established. Then, the patients in the validation set were divided into 3 groups according to their prognostic indexes. The groups in the validation set and their prognostic outcomes are presented in Figures 4B and 5B. The C statistics for the 5-year OS and LMFS of the training and validation sets are summarized in Table 5 (all  $P < 0.05$ ).

## DISCUSSION

Osteosarcoma is a heterogeneous cancer that exhibits wide variation in both clinical progression and prognosis. The Enneking staging system provides important clinical information for osteosarcoma, which is mainly diagnosed based on gross anatomy. However, the system has an obvious limitation as it ignores functional factors. Our study revealed that 5-year OS could be predicted by Enneking stage, tumor size, pretreatment neutrophil and PLT counts, and pretreatment ALP level. Moreover, tumor size, pretreatment neutrophil and PLT counts, and pretreatment ALP level were independent

prognostic factors for 5-year LMFS. A pretreatment prognostic index derived by combining points for each of these features could accurately divide patients into low, intermediate and high risk groups for both death and lung metastasis.

Metastasis is the most crucial step for osteosarcoma treatment failure, and the lung is the most commonly involved organ [18]. Data regarding lung metastasis are continually collected and recorded at our institute. Therefore, we chose 5-year OS and LMFS as our endpoints to develop a multivariate Cox model and a prognostic index for lung metastasis and death. Additionally, pelvic and vertebral osteosarcomas are rare and associated with poor outcomes. It is improper to investigate the prognostic factors of these forms in conjunction with extremity osteosarcoma [19]. Therefore, our study focused on extremity osteosarcoma patients.

In general, Enneking stage and tumor size are definitive prognostic factors for osteosarcoma, as shown in Bielack's study [20]. A higher Enneking stage or larger tumor size may indicate greater malignancy and increased difficulty achieving adequate surgical margin. A cutoff of 8-cm maximal tumor diameter was demonstrated to predict death and lung metastasis in osteosarcoma, consistent with Kim's study [21].

To our knowledge, ALP level is considered a clinically useful marker of bone formation. Biochemical markers that reflect skeletal activity are thought to be sensitive indicators of early bone metabolism disturbances [22]. Bacci et al demonstrated that ALP level adversely affected 5-year event free survival in 789 patients with

**Table 2: Univariate analysis of clinical factors for 5-year overall survival (OS) and lung metastasis-free survival (LMFS) in the training set**

| Variable                     | Overall survival |           |         | LMFS    |             |         |
|------------------------------|------------------|-----------|---------|---------|-------------|---------|
|                              | Patient          | 5-year OS | P-value | Patient | 5-year LMFS | P-value |
| Gender                       |                  |           |         |         |             |         |
| Male                         | 212              | 59.8      | 0.09    | 181     | 59.1        | 0.25    |
| Female                       | 128              | 69.7      |         | 122     | 62.4        |         |
| Age                          |                  |           |         |         |             |         |
| <14 years                    | 103              | 58.0      | 0.72    | 91      | 56.8        | 0.25    |
| ≥14 years                    | 237              | 56.0      |         | 212     | 62.0        |         |
| Histological type            |                  |           |         |         |             |         |
| Osteoblastic                 | 272              | 64.2      | 0.87    | 242     | 60.2        | 0.56    |
| Chondroblastic               | 46               | 60.2      |         | 43      | 59.1        |         |
| Fibroblastic                 | 10               | 70.1      |         | 8       | 56.0        |         |
| Others                       | 12               | 55.3      |         | 10      | 60.4        |         |
| Enneking stage               |                  |           |         |         |             |         |
| IIA                          | 38               | 76.5      | <0.01   | 38      | 79.4        | 0.05    |
| IIB                          | 265              | 59.5      |         | 265     | 58.2        |         |
| III                          | 37               | 20.3      |         | 0       |             |         |
| Tumor size                   |                  |           |         |         |             |         |
| ≤8 cm                        | 156              | 80.9      | <0.01   | 136     | 82.4        | <0.01   |
| >8 cm                        | 184              | 41.4      |         | 167     | 43.5        |         |
| Surgery type                 |                  |           |         |         |             |         |
| Amputation                   | 75               | 55.8      | 0.53    | 60      | 49.3        | 0.56    |
| Limb sparing                 | 265              | 61.6      |         | 243     | 54.7        |         |
| WBC × 10 <sup>9</sup>        |                  |           |         |         |             |         |
| <10                          | 271              | 58.6      | 0.37    | 240     | 64.8        | 0.03    |
| ≥10                          | 69               | 49.3      |         | 63      | 43.3        |         |
| Neutrophil × 10 <sup>9</sup> |                  |           |         |         |             |         |
| <6.4                         | 263              | 60.3      | <0.01   | 234     | 65.1        | 0.004   |
| ≥6.4                         | 77               | 42.0      |         | 69      | 43.5        |         |
| Lymphocyte × 10 <sup>9</sup> |                  |           |         |         |             |         |
| <3.3                         | 313              | 55.7      | 0.14    | 276     | 61.4        | 0.63    |
| ≥3.3                         | 27               | 69.3      |         | 27      | 51.7        |         |
| Platelet × 10 <sup>9</sup>   |                  |           |         |         |             |         |
| <300                         | 198              | 70.6      | <0.01   | 182     | 76.4        | <0.01   |
| ≥300                         | 142              | 41.2      |         | 121     | 39.4        |         |
| Hemoglobin × 10 <sup>9</sup> |                  |           |         |         |             |         |
| <130/120                     | 206              | 51.0      | 0.40    | 189     | 60.2        | 0.92    |

(Continued)

| Variable   | Overall survival |      |       | LMFS |      |      |
|------------|------------------|------|-------|------|------|------|
| ≥130/120   | 134              | 62.2 |       | 114  | 60.1 |      |
| Albumin    |                  |      |       |      |      |      |
| <35        | 8                | 75.0 | 0.14  | 7    | 85.7 | 0.41 |
| 35–50      | 311              | 55.1 |       | 277  | 59.8 |      |
| ≥50        | 21               | 67.0 |       | 19   | 65.6 |      |
| Fibrinogen |                  |      |       |      |      |      |
| <4         | 268              | 58.4 | 0.15  | 240  | 65.6 | 0.03 |
| ≥4         | 72               | 51.1 |       | 63   | 43.3 |      |
| LDH        |                  |      |       |      |      |      |
| <240       | 199              | 61.6 | 0.01  | 188  | 63.8 | 0.01 |
| ≥240       | 141              | 50.0 |       | 115  | 54.6 |      |
| ALP        |                  |      |       |      |      |      |
| <110/150   | 103              | 88.8 | <0.01 | 97   | 70.2 | 0.01 |
| ≥110/150   | 237              | 46.6 |       | 206  | 56.3 |      |

WBC: white blood cell; LDH: lactate dehydrogenase; ALP: alkaline phosphatase; OS: overall survival; LMFS: lung metastasis-free survival.

**Table 3: Multivariate analysis of clinical factors for 5-year overall survival (OS) and lung metastasis-free survival (LMFS) in the training set**

| Variable                     | 5-year OS (n = 340) |       |             |         | 5-year LMFS (n = 303) |       |             |         |
|------------------------------|---------------------|-------|-------------|---------|-----------------------|-------|-------------|---------|
|                              | β-value             | RR    | 95% CI      | P-value | β-value               | RR    | 95% CI      | P-value |
| Enneking stage               | 0.766               | 2.151 | 1.373–3.370 | 0.001   | –                     | –     | –           | –       |
| Tumor size                   | 0.595               | 1.814 | 1.154–2.851 | 0.010   | 0.960                 | 2.612 | 1.721–3.966 | <0.001  |
| Neutrophil × 10 <sup>9</sup> | 0.480               | 1.617 | 1.024–2.552 | 0.039   | 0.445                 | 1.561 | 1.011–2.408 | 0.044   |
| Platelet × 10 <sup>9</sup>   | 0.482               | 1.619 | 1.060–2.473 | 0.026   | 0.467                 | 1.595 | 1.091–2.330 | 0.016   |
| ALP                          | 1.421               | 4.140 | 1.907–8.987 | <0.001  | 0.551                 | 1.736 | 1.084–2.779 | 0.022   |

OS: overall survival; LMFS: lung metastasis-free survival; ALP: alkaline phosphatase.

extremity osteosarcoma, a finding that is consistent with the results of our current study [23]. In a previous study of another patient cohort, we found that pretreatment ALP level predicted metastasis and poor prognosis in osteosarcoma patients [3]. Pretreatment ALP level remained prognostically significant for 5-year OS and LMFS in this cohort at our institute. The prognostic value of these 3 factors is consistent with 2 additional studies that developed 2 postoperative models to predict metastasis in Enneking stage IIB osteosarcoma [21, 24].

Interestingly, pretreatment PLT and neutrophil counts were predictive of death and lung metastases in the patients with extremity osteosarcoma. Based on preclinical data from other types of cancers [25], circulating PLTs might shield tumor cells from the host immune response [26], promote tumor cell migration and invasion [27], regulate angiogenesis, and maintain vascular integrity [28]. Takagi reported that PLTs could promote osteosarcoma cell growth by activating the PLT-derived growth factor receptor–Akt signaling axis [29].



**Table 4A: The Prognostic Index for 5-year Overall Survival**

| Risk factors                 | 0        | 1     | 2   | 3        | 4   |
|------------------------------|----------|-------|-----|----------|-----|
| Enneking stage               | IIA      |       | IIB |          | III |
| Tumor size                   | ≤8 cm    | >8 cm |     |          |     |
| Neutrophil × 10 <sup>9</sup> | <6.4     | ≥6.4  |     |          |     |
| Platelet × 10 <sup>9</sup>   | <300     | ≥300  |     |          |     |
| ALP                          | <110/150 |       |     | ≥110/150 |     |

**Table 4B: The Prognostic Index for 5-year lung metastasis free survival**

| Risk factors                 | 0        | 1        | 2     |
|------------------------------|----------|----------|-------|
| Tumor size                   | ≤8 cm    |          | >8 cm |
| Neutrophil × 10 <sup>9</sup> | <6.4     | ≥6.4     |       |
| Platelet × 10 <sup>9</sup>   | <300     | ≥300     |       |
| ALP                          | <110/150 | ≥110/150 |       |

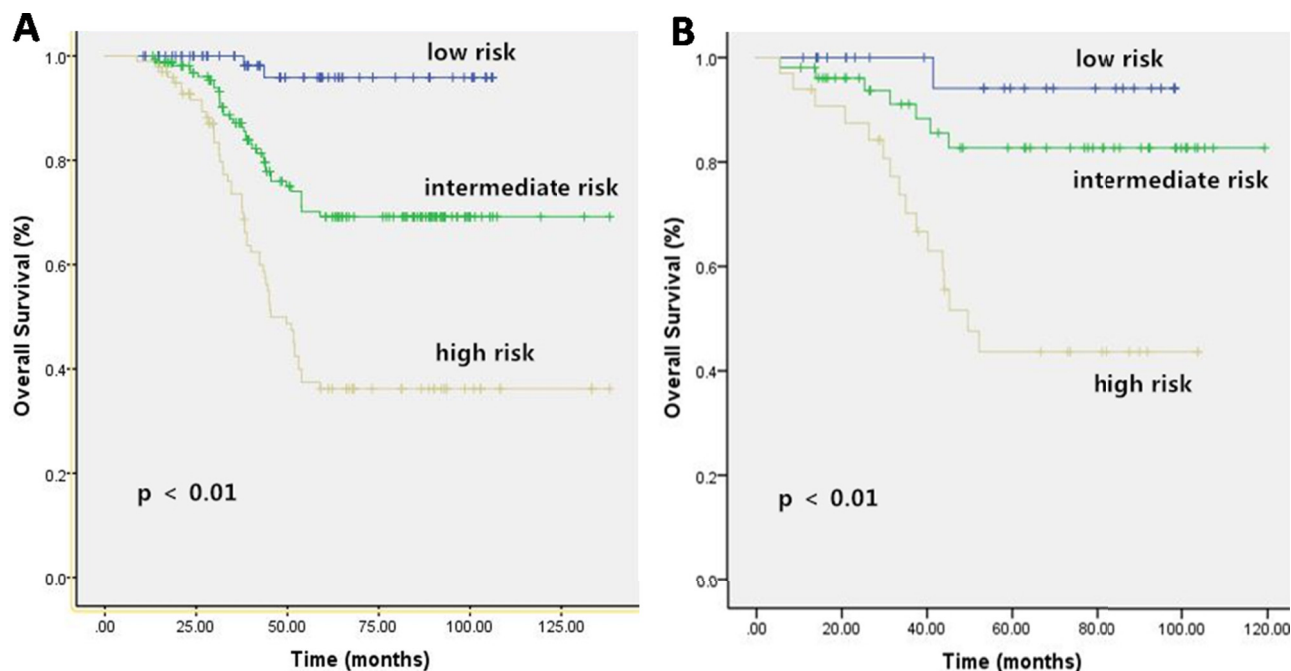

**Figure 4: Kaplan-Meier Curves for Overall Survival (OS) in Training Set A. and Validation Set B.** A. Eleven subgroups of development cohort merged to form three categories with significantly different prognoses. B. There were significant statistical differences on 5 year OS among the three categories of validation cohort, according to our prognostic classification.

Furthermore, pretreatment PLT and neutrophil counts are markers of host inflammation status. Higher pretreatment PLT and neutrophil counts may promote tumor cell metastasis and lead to poor outcomes [30, 31]. Lee et al demonstrated that a higher pretreatment neutrophil count adversely affected survival outcomes in cases of metastatic

gastrointestinal stromal tumor treated with imatinib [32]. The definitive roles of PLTs and neutrophils and the underlying mechanisms should be accounted for in future studies and clinical trials. However, in contrast to the findings of a recent study of metastasis in osteosarcoma, age at diagnosis and gender were not associated with

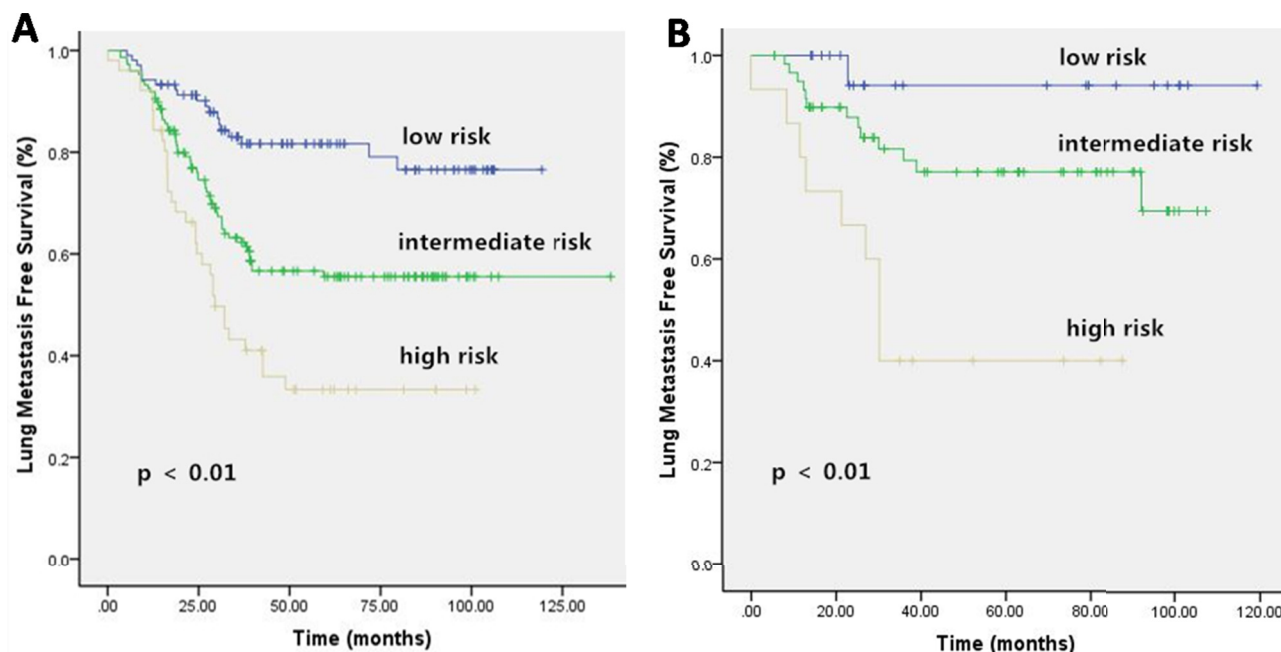

**Figure 5: Kaplan-Meier Curves for Lung Metastasis Free Survival (LMFS) in Training Set A. and Validation Set B.** A. Five subgroups of development cohort merged to form three categories with significantly different prognoses. B. There were significant statistical differences on 5 year LMFS among the three categories of validation cohort, according to our prognostic classification.

**Table 5: C-statistic results**

| Items                             | C-statistic | 95% confidence interval | P-value |
|-----------------------------------|-------------|-------------------------|---------|
| 5-year OS in the training set     | 0.723       | 0.676 to 0.771          | <0.05   |
| 5-year LMFS in the training set   | 0.661       | 0.612 to 0.710          | <0.05   |
| 5-year OS in the validation set   | 0.710       | 0.611 to 0.809          | <0.05   |
| 5-year LMFS in the validation set | 0.693       | 0.592 to 0.795          | <0.05   |

OS: overall survival; LMFS: lung metastasis-free survival.

survival outcomes [33]. This may be due to the study of patients of different races or the use of different chemotherapy protocols.

To our knowledge, the C statistic is used to assess the predictive accuracy of a model. In the validation set, the C statistics for 5-year OS and LMFS were 0.710 and 0.693. These values were similar to those of Kim's study, which aimed to assess the 5-year probability of developing metastasis after neo-adjuvant chemotherapy and definitive surgery for AJCC stage II extremity osteosarcoma and found a C statistic of 0.78 [21]. A high C statistic indicates that the patients in the high-risk group are likely to have worse survival outcomes than those identified as having low risk according to the prognostic index. Therefore, our prognostic index was effective in predicting survival outcomes for extremity osteosarcoma.

The strengths of our study include the large number of osteosarcoma patients analyzed, the measurement of risk factors that can be easily obtained from routine tests, and their use to accurately classify patients into low-, intermediate-, and high-risk groups. Most importantly, this prognostic index for death and lung metastasis can be applied at the initiation of treatment. With respect to clinical trials, our prognostic index model could help study designers stratify risk, enroll comparable patients in different treatment arms and interpret trial outcomes. Second, the index could help clinicians apply individualized therapies according to the prognostic index at the time of diagnosis. For high-risk patients, doctors may advise closer monitoring, increased chemotherapy, or a more sensitive chemotherapy regimen. Third, this prognostic index may encourage researchers to investigate the

mechanisms responsible for the higher risk of some patients, such as the molecular or genetic mechanisms. However, several limitations of our study also require consideration. First, only patients from one institute were included; this ensures treatment consistency but potentially limits the external validity of the findings. Second, it was a retrospective study. Third, the lack of functional assessment, such as the Musculoskeletal Tumor Society Score, and psychosocial outcomes was also a major limitation. Fourth, the included patients were all Mongolian which may make the results of this study less globally relevant. Finally, patients were enrolled from 2005 to 2013, which may increase the heterogeneity of the cohort. Therefore, this prognostic index should be prospectively validated at additional institutions.

## CONCLUSION

We developed a prognostic index to classify extremity osteosarcoma patients into low-, medium-, and high-risk groups for death and lung metastasis. These findings may be useful for clinicians performing risk stratification and designing individualized therapies at the time of diagnosis. These findings may also aid researchers in the design and interpretation of clinical trials.

## CONFLICTS OF INTEREST

The authors have disclosed no relevant financial relationship.

## SUPPORTED BY

National Natural Science Foundation of China (No. 81272939); Science and Technology Planning Project of Guangdong Province, China (No.2009B060100036)

## REFERENCES

- Biermann JS, Adkins DR, Agulnik M, Benjamin RS, Brigman B, Butrynski JE, Cheong D, Chow W, Curry WT, Frassica DA, Frassica FJ, Hande KR, Hornicek FJ, Jones RL, Mayerson J, McGarry SV, et al. Bone cancer. *Journal of the National Comprehensive Cancer Network: JNCCN*. 2013; 11:688–723.
- Gorlick R, Anderson P, Andrulis I, Arndt C, Beardsley GP, Bernstein M, Bridge J, Cheung NK, Dome JS, Ebb D, Gardner T, Gebhardt M, Grier H, Hansen M, Healey J, Helman L, et al. Biology of childhood osteogenic sarcoma and potential targets for therapeutic development: meeting summary. *Clinical cancer research : an official journal of the American Association for Cancer Research*. 2003; 9:5442–5453.
- Han J, Yong B, Luo C, Tan P, Peng T, Shen J. High serum alkaline phosphatase cooperating with MMP-9 predicts metastasis and poor prognosis in patients with primary osteosarcoma in Southern China. *World journal of surgical oncology*. 2012; 10:37.
- McMillan DC. The systemic inflammation-based Glasgow Prognostic Score: a decade of experience in patients with cancer. *Cancer treatment reviews*. 2013; 39:534–540.
- Kinoshita A, Onoda H, Imai N, Iwaku A, Oishi M, Fushiya N, Koike K, Nishino H, Tajiri H. Comparison of the prognostic value of inflammation-based prognostic scores in patients with hepatocellular carcinoma. *British journal of cancer*. 2012; 107:988–993.
- Proctor MJ, Morrison DS, Talwar D, Balmer SM, Fletcher CD, O'Reilly DS, Foulis AK, Horgan PG, McMillan DC. A comparison of inflammation-based prognostic scores in patients with cancer. A Glasgow Inflammation Outcome Study. *Eur J Cancer*. 2011; 47:2633–2641.
- Szkandera J, Absenger G, Liegl-Atzwanger B, Pichler M, Stotz M, Samonigg H, Glehr M, Zacherl M, Stojakovic T, Gerger A, Leithner A. Elevated preoperative neutrophil/lymphocyte ratio is associated with poor prognosis in soft-tissue sarcoma patients. *British journal of cancer*. 2013; 108:1677–1683.
- Choi ES, Kim HS, Han I. Elevated preoperative systemic inflammatory markers predict poor outcome in localized soft tissue sarcoma. *Annals of surgical oncology*. 2014; 21:778–785.
- Nakamura T, Grimer RJ, Gaston CL, Watanuki M, Sudo A, Jeys L. The prognostic value of the serum level of C-reactive protein for the survival of patients with a primary sarcoma of bone. *The bone & joint journal*. 2013; 95-B:411–418.
- Szkandera J, Gerger A, Liegl-Atzwanger B, Absenger G, Stotz M, Friesenbichler J, Trajanoski S, Stojakovic T, Eberhard K, Leithner A, Pichler M. The lymphocyte/monocyte ratio predicts poor clinical outcome and improves the predictive accuracy in patients with soft tissue sarcomas. *International journal of cancer Journal international du cancer*. 2014; 135:362–370.
- Lansky SB, List MA, Lansky LL, Ritter-Sterr C, Miller DR. The measurement of performance in childhood cancer patients. *Cancer*. 1987; 60:1651–1656.
- Zelcer S, Kellick M, Wexler LH, Shi W, Sankaran M, Lo S, Healey J, Huvos AG, Meyers PA, Gorlick R. Methotrexate levels and outcome in osteosarcoma. *Pediatric blood & cancer*. 2005; 44:638–642.
- Crews KR, Liu T, Rodriguez-Galindo C, Tan M, Meyer WH, Panetta JC, Link MP, Daw NC. High-dose methotrexate pharmacokinetics and outcome of children and young adults with osteosarcoma. *Cancer*. 2004; 100:1724–1733.
- Szulc P, Seeman E, Delmas PD. Biochemical measurements of bone turnover in children and adolescents. *Osteoporosis international : a journal established as result of cooperation between the European Foundation for Osteoporosis and*

- the National Osteoporosis Foundation of the USA. 2000; 11:281–294.
15. Rassi A, Jr., Rassi A, Little WC, Xavier SS, Rassi SG, Rassi AG, Rassi GG, Hasslocher-Moreno A, Sousa AS, Scanavacca MI. Development and validation of a risk score for predicting death in Chagas' heart disease. *The New England journal of medicine*. 2006; 355:799–808.
  16. Chang H, Gao J, Xu BQ, Guo SP, Lu RB, Li G, Huang SM, Han F, Liu ZG, Tao YL, Tu ZW, Chen C, Li XH, Xia YF. Haemoglobin, neutrophil to lymphocyte ratio and platelet count improve prognosis prediction of the TNM staging system in nasopharyngeal carcinoma: development and validation in 3,237 patients from a single institution. *Clin Oncol (R Coll Radiol)*. 2013; 25:639–646.
  17. Altman DG, Royston P. What do we mean by validating a prognostic model? *Statistics in medicine*. 2000; 19:453–473.
  18. Petrilli AS, de Camargo B, Filho VO, Bruniera P, Brunetto AL, Jesus-Garcia R, Camargo OP, Pena W, Pericles P, Davi A, Prospero JD, Alves MT, Oliveira CR, Macedo CR, Mendes WL, Almeida MT, et al. Results of the Brazilian Osteosarcoma Treatment Group Studies, III, and IV: prognostic factors and impact on survival. *Journal of clinical oncology: official journal of the American Society of Clinical Oncology*. 2006; 24:1161–1168.
  19. Ozaki T, Flege S, Kevric M, Lindner N, Maas R, Delling G, Schwarz R, von Hochstetter AR, Salzer-Kuntschik M, Berdel WE, Jurgens H, Exner GU, Reichardt P, Mayer-Steinacker R, Ewerbeck V, Kotz R, et al. Osteosarcoma of the pelvis: experience of the Cooperative Osteosarcoma Study Group. *Journal of clinical oncology: official journal of the American Society of Clinical Oncology*. 2003; 21:334–341.
  20. Bielack SS, Kempf-Bielack B, Delling G, Exner GU, Flege S, Helmke K, Kotz R, Salzer-Kuntschik M, Werner M, Winkelmann W, Zoubek A, Jurgens H, Winkler K. Prognostic factors in high-grade osteosarcoma of the extremities or trunk: an analysis of 1,702 patients treated on neoadjuvant cooperative osteosarcoma study group protocols. *Journal of clinical oncology: official journal of the American Society of Clinical Oncology*. 2002; 20:776–790.
  21. Kim SH, Shin KH, Kim HY, Cho YJ, Noh JK, Suh JS, Yang WI. Postoperative nomogram to predict the probability of metastasis in Enneking stage IIB extremity osteosarcoma. *BMC cancer*. 2014; 14:666.
  22. Ambroszkiewicz J, Gajewska J, Klepacka T, Chelchowska M, Laskowska-Klita T, Wozniak W. Clinical utility of biochemical bone turnover markers in children and adolescents with osteosarcoma. *Advances in medical sciences*. 2010; 55:266–272.
  23. Bacci G, Longhi A, Versari M, Mercuri M, Briccoli A, Picci P. Prognostic factors for osteosarcoma of the extremity treated with neoadjuvant chemotherapy: 15-year experience in 789 patients treated at a single institution. *Cancer*. 2006; 106(5):1154–1161.
  24. Kim MS, Lee SY, Lee TR, Cho WH, Song WS, Koh JS, Lee JA, Yoo JY, Jeon DG. Prognostic nomogram for predicting the 5-year probability of developing metastasis after neo-adjuvant chemotherapy and definitive surgery for AJCC stage II extremity osteosarcoma. *Annals of oncology: official journal of the European Society for Medical Oncology / ESMO*. 2009; 20:955–960.
  25. Sharma D, Brummel-Ziedins KE, Bouchard BA, Holmes CE. Platelets in tumor progression: a host factor that offers multiple potential targets in the treatment of cancer. *Journal of cellular physiology*. 2014; 229:1005–1015.
  26. Lal I, Dittus K, Holmes CE. Platelets, coagulation and fibrinolysis in breast cancer progression. *Breast cancer research: BCR*. 2013; 15:207.
  27. Erpenbeck L, Schon MP. Deadly allies: the fatal interplay between platelets and metastasizing cancer cells. *Blood*. 2010; 115:3427–3436.
  28. Kuznetsov HS, Marsh T, Markens BA, Castano Z, Greene-Colozzi A, Hay SA, Brown VE, Richardson AL, Signoretti S, Battinelli EM, McAllister SS. Identification of Luminal Breast Cancers That Establish a Tumor-Supportive Macroenvironment Defined by Proangiogenic Platelets and Bone Marrow-Derived Cells. *Cancer Discov*. 2012; 2:1150–1165.
  29. Takagi S, Takemoto A, Takami M, Oh-Hara T, Fujita N. Platelets promote osteosarcoma cell growth through activation of the platelet-derived growth factor receptor-Akt signaling axis. *Cancer science*. 2014; 105:983–988.
  30. Mantovani A, Allavena P, Sica A, Balkwill F. Cancer-related inflammation. *Nature*. 2008; 454:436–444.
  31. Nakamura T, Matsumine A, Matsubara T, Asanuma K, Uchida A, Sudo A. The Combined Use of the Neutrophil-Lymphocyte Ratio and C-Reactive Protein Level as Prognostic Predictors in Adult Patients With Soft Tissue Sarcoma. *J Surg Oncol*. 2013; 108:481–485.
  32. Lee CK, Goldstein D, Gibbs E, Joensuu H, Zalberg J, Verweij J, Casali PG, Maki RG, Cioffi A, McArthur G, Lord SJ, Yip D, Kanjanapan Y, Rutkowski P. Development and validation of prognostic nomograms for metastatic gastrointestinal stromal tumour treated with imatinib. *Eur J Cancer*. 2015; 51:852–860.
  33. Collins M, Wilhelm M, Conyers R, Herschtal A, Whelan J, Bielack S, Kager L, Kuhne T, Sydes M, Gelderblom H, Ferrari S, Picci P, Smeland S, Eriksson M, Petrilli AS, Bleyer A, et al. Benefits and adverse events in younger versus older patients receiving neoadjuvant chemotherapy for osteosarcoma: findings from a meta-analysis. *Journal of clinical oncology: official journal of the American Society of Clinical Oncology*. 2013; 31:2303–2312.
